# Supplementary material for: Num1 anchors mitochondria to the plasma membrane via two domains with different lipid binding specificities
Source: PubMed Central journal article supplement — J Cell Biol. 2016 Jun 6;213(5):513–24. doi: 10.1083/jcb.201511021 (PMC4896055; doi:10.1083/jcb.201511021), 2016-06-06
Supplement: JCB_201511021_sm.pdf [file JCB_201511021_sm.pdf]

Ping et al., <http://www.jcb.org/cgi/content/full/jcb.201511021/DC1>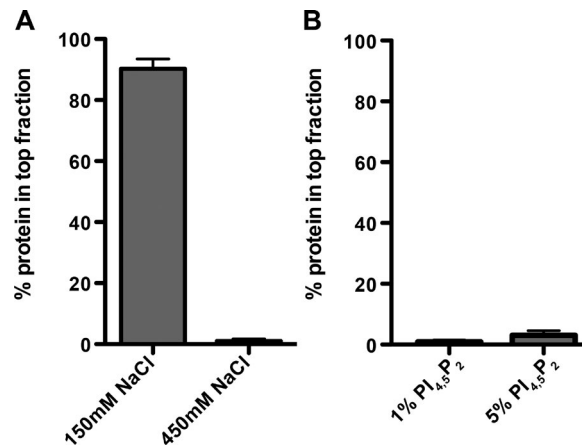

Figure S1. **Num1CC-phospholipid interactions.** (A and B) Num1CC was incubated with SoyCl liposomes in the presence of 150 or 450 mM NaCl (A) or liposomes composed of PC and the indicated mol% of PI<sub>4,5</sub>P<sub>2</sub> (B), and the reactions were subjected to liposome floatation and analysis as described in Fig. 3 A. Data are shown as the mean  $\pm$  SEM;  $n = 3$  independent experiments.

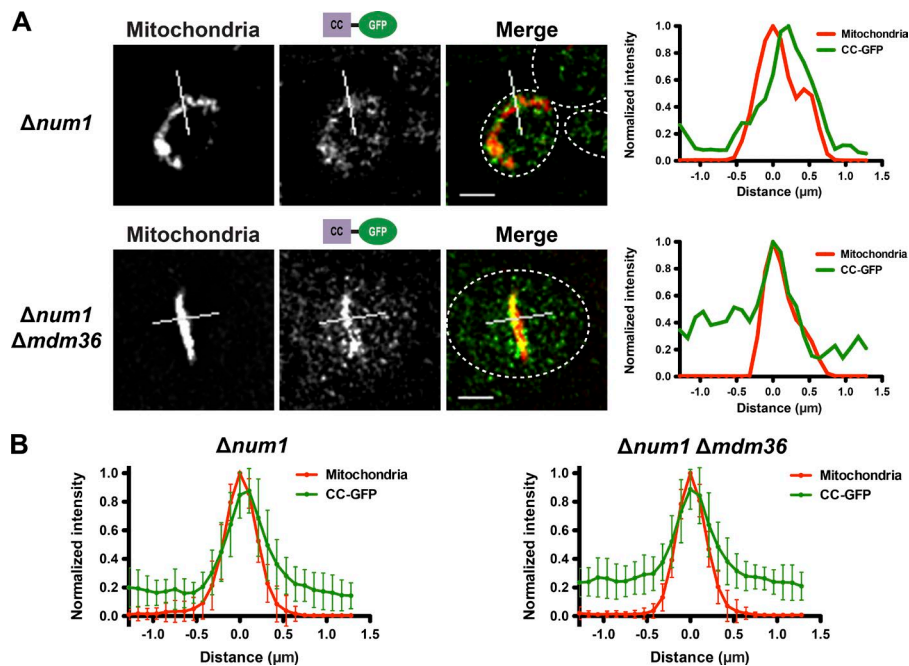

Figure S2. **Num1CC associates with mitochondria in cells.** (A)  $\Delta num1$  (top) and  $\Delta num1 \Delta mdm36$  (bottom) cells expressing CC-GFP (as seen in the schematic) and mito-RED were analyzed by fluorescence microscopy. Single focal planes are shown. The cell cortex is outlined with a dashed white line. Bars, 2  $\mu m$ . The graphs show normalized fluorescence intensities of mito-RED (red) and CC-GFP (green) along a line drawn perpendicular to a mitochondrial tubule as indicated in the corresponding image (white line). The position of peak mito-RED intensity was set at 0  $\mu m$ . (B) Graphs of normalized fluorescence intensity profiles for lines analyzed as described in A. The mean intensities  $\pm$  SD are plotted;  $n \geq 20$ .

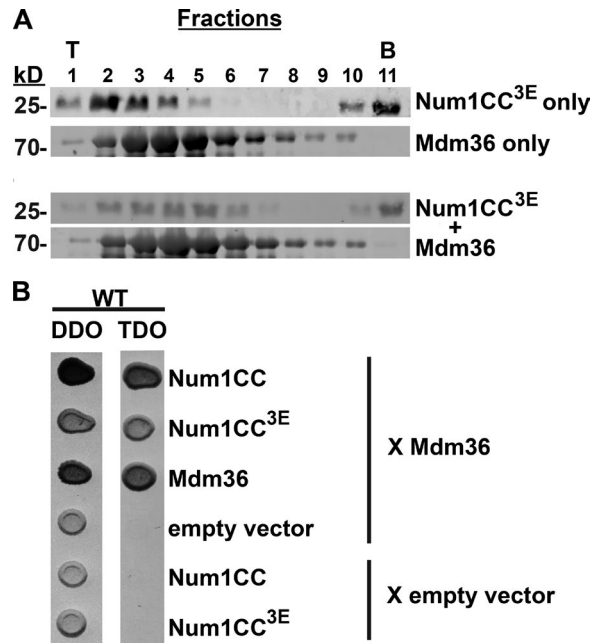

Figure S3. **Num1<sup>3E</sup> interacts with Mdm36.** (A) Purified Num1CC<sup>3E</sup> (5  $\mu$ M) and Mdm36 (5  $\mu$ M) alone and in combination were subjected to sucrose density gradient analysis. Gradients were manually fractionated from top (T) to bottom (B) and analyzed by SDS-PAGE and Western blot using an anti-T7 antibody. (B) Yeast two-hybrid analysis was used to assess the interaction of a Gal4BD-Mdm36 fusion with Gal4AD-Num1CC and Gal4AD-Num1CC<sup>3E</sup> fusions. Protein-protein interactions were assessed by growth on triple-dropout (TDO) medium. TDO, SC-LEU-TRP-HIS; DDO, SC-LEU-TRP; WT, wild type.
